# Supplementary material
Source: HighWire-hosted journal article supplement (https://cmajopen.ca/highwire/filestream/81146/field_highwire_adjunct_files/1/original-submission.pdf)
Supplement: original-submission.pdf [file original-submission.pdf]

1  
2  
3  
4  
5  
6  
7  
8  
9  
10  
11  
12  
13  
14  
15  
16  
17  
18  
19  
20  
21  
22  
23  
24  
25  
26  
27  
28  
29  
30  
31  
32  
33  
34  
35  
36  
37  
38  
39  
40  
41  
42  
43  
44  
45  
46  
47  
48  
49  
50  
51  
52  
53  
54  
55  
56  
57  
58  
59  
60

## Trends in Treatment for Cannabis Problems in Ontario - Fiscal Years 2010/11 to 2015/16: A Panel Data Study

Sameer Imtiaz (MSc)<sup>a,b</sup>, Paul Kurdyak (MD, PhD)<sup>b,c</sup>, Andriy V. Samokhvalov (MD, PhD)<sup>a,b</sup>, Mahhum Mumtaz Mobashir (BASC)<sup>b</sup> Bill Que (BSc)<sup>b</sup>, Daniel Elliot (BSc)<sup>b</sup> & Jürgen Rehm (PhD)<sup>a,b</sup>

- a) University of Toronto, Toronto, Ontario, Canada.
- b) Centre for Addiction and Mental Health, Toronto, Ontario, Canada
- c) Institute for Clinical Evaluative Sciences, Toronto, Ontario, Canada.

### Funding

This study received no funding. Sameer Imtiaz was supported by the Queen Elizabeth II/H. David Archibald Graduate Scholarship in Science and Technology.

### Declarations of Authors Competing Interests

All authors declare no competing interests.

### Correspondence

Sameer Imtiaz  
Institute for Mental Health Policy Research,  
Centre for Addiction and Mental Health,  
T521 - 33 Russell Street,  
Toronto, Ontario,  
M5S 2S1, Canada.  
1-416-535-8501 ext. 36768  
[sameer.imtiaz@gmail.com](mailto:sameer.imtiaz@gmail.com)

## ABSTRACT

### Background

Trends in clients receiving treatment for cannabis problems in Ontario were examined. The addiction severity of these clients was also characterized.

### Methods

This was a panel design study using data from the Drug and Alcohol Treatment Information System, the reporting system for publicly funded addiction treatment in Ontario. All clients receiving treatment for cannabis problems between April 01, 2010 and March 31, 2016 were included. Two groups of clients were formed: cannabis as the only problem substance (CO) and cannabis plus other problem substances (CP). Numbers of clients among these two groups by new admissions and total caseload (new admissions plus carryovers) were generated for each fiscal year. Addiction severity was characterized by cannabis use frequency. Trends were assessed through regression and chi-square analyses.

### Results

New admissions among the CO group decreased from 2,954 clients (95% CI: 2,848-3,062) in 2010/11 to 2,342 clients (95% CI: 2,248-2,439) in 2015/16, representing a percentage decrease of 21% (linear trend test p-value: 0.012). Similar trends were observed among the total caseload of the CO group. New admissions among the CP group were stable, but the total caseload increased by 8% from 20,139 clients (95% CI: 19,862 - 20,419) in 2011/12 to 21,816 clients (95% CI: 21,527-22,107) in 2015/16 (linear trend test p-value: 0.005). Proportions of daily cannabis use frequency increased among all treatment groups (Percentage Change 7-31%).

### Interpretation

The decreases in treatment utilization and increases in addiction severity may be suggestive of reductions in clinically unnecessary treatments of cannabis use disorders.

### KEYWORDS

Canada – cannabis – cannabis use disorders – health services

## 1. INTRODUCTION

Cannabis is the most commonly used illicit substance in Canada, with a 12-month prevalence nearing 12% among those 15 years and older.(1) About one in ten cannabis users develop cannabis use disorders,(2) a state characterized by problematic use despite clinically significant impairment or distress.(3) Cannabis use disorders are the primary source of the cannabis-attributable burden of disease in Canada, constituting more than 70% of the disability-adjusted life years.(4, 5)

Normalization of cannabis use has continued in Canada,(6) a process whereby drug use becomes less stigmatized and more accepted as normative behavior.(7) Legislation increasing access to medicinal cannabis was introduced in 2013.(8) Under the new legislation, physicians are designated as the gatekeepers, whereas the government has limited itself to supply regulation.(8) As a consequence, more than 2% of the adult Canadian population is expected to self-identify as medicinal cannabis users over the coming years.(8) Furthermore, public opinion towards cannabis control policies has continued to shift away from favoring prohibition,(9) leading the government to commit to legalizing recreational cannabis by 2018. At the same time, the prevalence of 12-month cannabis use has increased from 11% in 2013 to 12% in 2015.(1, 10). This increase in general has been pronounced in Ontario, where prevalence has risen by 67% between 1996 and 2015.(11)

Given these recent developments, examination of trends in cannabis-related harms are of utmost interest. Treatment of cannabis use disorders can be considered an indirect indicator of cannabis use disorders. Most relevant studies on this topic are outdated, as well as based on clinical samples from single agencies, limiting the generalizability of their results.(12-16) However, some evidence from Ontario suggests that after increasing towards the end of the last decade, treatment utilization for cannabis use disorders may be decreasing.(17-19) Although comparable data is not available in Canada, prevalence of almost daily or daily cannabis use has increased between 2002 and 2014 in the United States.(20) As such, the addiction severity of clients receiving treatment for cannabis problems may be increasing.

Using health administrative data from the addiction treatment system in Ontario, trends in clients receiving treatment for cannabis problems were examined between fiscal years 2010/11 and 2015/16. The addiction severity of these clients was also characterized. It was hypothesized that the numbers of clients receiving treatment would decrease over time, but the addiction severity would increase.

## 2. METHODS

### 2.1. Study Setting, Design and Data Source

A panel design was operationalized to estimate the numbers of clients receiving treatment for cannabis problems in Ontario from 2010/11 to 2015/16, as well as characterize their addiction severity.

1  
2  
3 Data were obtained from the Drug and Alcohol Treatment Information System (DATIS), the  
4 reporting system for publicly funded addiction treatment in Ontario. As part of this health  
5 administrative database, more than 150 agencies are required to submit service utilization  
6 data for each fiscal year (April 1<sup>st</sup> to March 31<sup>st</sup>), with a participation rate exceeding 95% at  
7 the service-level. These agencies deliver a range of referral, outpatient, residential and  
8 withdrawal management services. However, private, self-help and pharmacotherapeutic  
9 services are not included. The treatment plan is typically a negotiated process between the  
10 client and staff. All data are entered electronically by staff and stored centrally at the Centre  
11 for Addiction and Mental Health.  
12  
13

## 14 15 **2.2. Measures**

16 At the beginning of an admission, clients provide data on a range of self-reported  
17 characteristics. Data on up to five, non-ranked problem substances related to the admission  
18 are also collected at this time. On their basis, clients were divided into two groups : 1)  
19 cannabis as the only problem substance (CO), and 2) cannabis plus other problem  
20 substances (CP). These classifications did not necessarily correspond to clinical diagnoses  
21 of cannabis use disorders.  
22  
23

24 Sociodemographic characteristics included age, sex, relationship status, educational  
25 attainment, employment status, legal problems and mandated treatment (e.g. by legal  
26 system, family). The primary addiction severity measure was cannabis use frequency, an  
27 established predictor of cannabis problems.(21) In particular, some evidence indicates that  
28 frequent cannabis use correlates with dependence severity.(22) The secondary addiction  
29 severity measure was utilization of withdrawal management services.  
30  
31  
32

## 33 34 **2.3. Selection Criteria**

35 Admissions that began between 2010/11 and 2015/16 were included. The exclusion  
36 criteria consisted of admissions involving 1) family members of clients, 2) non-Ministry of  
37 Health and Long-Term Care funded clients, 3) gambling problems services only, 4) missing  
38 problem substance data, and 5) non-cannabis problems only.  
39  
40

## 41 42 **2.4. Classification Methodology**

43 Admissions were categorized into fiscal years ranging from 2010/11 to 2015/16 based on  
44 their start dates. For each fiscal year, the first admission was selected as a new admission,  
45 with preference given to CP over CO admissions, if both existed. This decision was made to  
46 prevent misclassification, as clients often recognize other substance problems once they  
47 begin an interaction with the addiction treatment system. Carryover admissions (i.e.  
48 admissions continuing from previous fiscal years) were selected if a client did not begin an  
49 admission in the fiscal year. As before, preference was given to CP over CO carryover  
50 admissions. For all clients, the most wide-ranging carryover admissions were selected, with  
51 representation ensured across all fiscal years where treatment was received. In the event  
52 of duplicate carryover admissions, selection for the fiscal year was dependent on the start  
53 date of the admissions. On the other hand, length and end date of the admissions guided the  
54 selection for the fiscal year when overlapping carryover admissions were encountered.  
55  
56

## 57 58 **2.5. Statistical Analyses**

Two sets of numbers of clients by fiscal year were generated for both CO and CP groups: new admissions and total caseload (new admissions plus carryovers). The methodology yielded unduplicated numbers of clients for each fiscal year. Exact Poisson confidence intervals were generated for these numbers, with regression analyses utilized for the assessment of linear trends. Thereafter, trends in sociodemographic characteristics were assessed among new admissions through chi-square analyses. Subsequently, trends in cannabis use frequency and utilization rates of withdrawal management services were assessed through chi-square analyses and regression analyses, respectively. Importantly, total caseload estimates for 2010/11 did not include carryover admissions due to the underlying study design. As such, they were not generated and excluded from all trend analyses. All analyses were conducted in SAS Version 9.4 and STATA Version 14.

## 2.6. Ethics Compliance

Approval to access the data was obtained from the research ethics board at the Centre for Addiction and Mental Health (Protocol Reference # 012/2017). All data analyzed were de-identified and cells of less than five in cross-tabulations were suppressed in the presentation of the results.

## 3. RESULTS

The data analyzed included 152,984 admissions from 83,621 clients. There were 25,463 admissions that started in 2010/11, 26,413 admissions in 2011/12, 25,399 admissions in 2012/13, 25,623 admissions in 2013/14, 25,258 admissions in 2014/15 and 24,828 admissions in 2015/16.

### 3.1. Trends in Treatment Utilization

Trends in clients receiving treatment among the CO and CP groups are displayed in Figures 1 and 2, respectively (see also Table S1 in the supplementary appendix for the underlying data).

After increasing between 2010/11 and 2011/12, there were annual decreases thereafter in new admissions among the CO group. During the examined time frame, new admissions decreased overall from 2,954 clients (95% Confidence Interval (CI): 2,848 - 3,062) in 2010/11 to 2,342 clients (95% CI: 2,248 - 2,439) in 2015/16, representing a percentage decrease of 21% (linear trend test p-value: 0.012). Similar decreases were observed among the total caseload of the CO group: 4,188 clients (95% CI: 4,062 - 4,317) in 2011/12 to 3,650 clients (95% CI: 3,533 - 3,770) in 2015/16 (linear trend test p-value = 0.013).

New admissions among the CP group were more or less stable between 2010/11 and 2015/16 (linear trend test p-value: 0.543). However, there were annual increases in the total caseload among the CP group, rising from 20,139 clients (95% CI: 19,862 - 20,419) in 2011/12 to 21,816 clients (95% CI: 21,527 - 22,107) in 2015/16 (linear trend test p-value: 0.005).

### 3.2. Trends in Sociodemographic Characteristics

Trends in sociodemographic characteristics among new admissions of CO and CP groups between 2010/11 and 2015/16 are presented in Table 1. Among both CO and CP groups,

1  
2  
3 proportions decreased of male clients (Percentage Change ( $\Delta$ ) 2 – 4%), less than secondary  
4 school education clients ( $\Delta$  17 – 19%) and student or re-training clients ( $\Delta$  28 – 32%), but  
5 proportions increased of non-mandated clients ( $\Delta$  12 – 14%). Age decreased overall among  
6 both groups, as the proportion of less than 18 year old clients decreased ( $\Delta$  27%) among  
7 the CO group and proportion of 25 – 44 year old clients increased ( $\Delta$  10%) among the CP  
8 group. In terms of relationship status, proportions decreased of single clients ( $\Delta$  4%)  
9 among the CO group and of widowed or divorced clients ( $\Delta$  8%) among the CP group.  
10 Although the proportion of clients awaiting trial or sentencing increased ( $\Delta$  34%) among  
11 the CO group, there were decreases in the proportion of probational, paroled or  
12 incarcerated clients ( $\Delta$  20%) among the CP group.  
13  
14  
15

### 16 17 **3.3. Trends in Addiction Severity**

18 Trends in cannabis use frequency among CO and CP groups' new admissions and total  
19 caseloads between 2010/11 and 2015/16 are presented in Table 2. There were annual  
20 fluctuations in cannabis use frequency among new admissions of the CO group. However,  
21 the proportion of daily cannabis use frequency increased overall by 31%, rising from 37%  
22 in 2010/11 to 48% in 2015/16. Similar trends were observed in daily cannabis use  
23 frequency among the CO group's total caseload ( $\Delta$  17%), as well as CP group's new  
24 admissions and total caseload ( $\Delta$  12% and 7%, respectively).  
25  
26

27 There were annual decreases in rates of utilization of withdrawal management services for  
28 most groups from 2010/11 to 2013/14, but subsequent increases were observed from  
29 there onwards (Table S2 in the supplementary appendix). The linear trend test was non-  
30 significant for all groups, with the exception of the increase observed among the CO group's  
31 new admissions (linear trend test p-value: 0.044).  
32  
33

## 34 35 **4. INTERPRETATION**

### 36 37 **4.1. Summary of Main Results**

38 Through health administrative data obtained from the addiction treatment system in  
39 Ontario, it was shown that new admissions and total caseload among the CO group  
40 decreased between 2010/11 and 2015/16. On the other hand, new admissions were stable  
41 during the examined time frame among the CP group, but the total caseload increased. At  
42 the same time, proportions of daily cannabis use, an indicator of addiction severity,  
43 increased among both CO and CP group's new admissions and total caseloads.  
44  
45

### 46 47 **4.2. Comparisons and Explanations of Findings**

48 Based primarily on new admissions in a fiscal year, health administrative data from the  
49 addiction treatment system in Ontario has been analyzed before to obtain insights about  
50 treatment of cannabis problems. Urbanoski and colleagues showed that cannabis was  
51 reported by 6,219 clients as a primary problem substance and by 14,633 clients as a  
52 problem substance in 2000/01.(12) However, the system has undergone considerable  
53 changes since then, limiting the comparability with the results of the present study.  
54 Rotondi and Rush later demonstrated that reports of cannabis as a problem substance  
55 increased from 16,351 clients in 2005/06 to 17,854 in 2009/10.(17) Notably, minor  
56 decreases in numbers of clients were observed in their study between 2008/09 and  
57  
58  
59  
60



1  
2  
3 2009/10.(17) The National Treatment Indicators Reports most recently documented that  
4 reports of cannabis as a problem substance decreased from a little over 30% among all  
5 admissions in 2012/13 to 20% in 2013/14.(18, 19) Even though a different methodology  
6 was used, as the estimates from the National Treatment Indicators Reports did not account  
7 for multiple admissions per client, and were relative to the proportions of all  
8 admissions,(18, 19) their trends do seem consistent with the results of the present study.  
9  
10

11  
12 An important consideration concerning the legalization of recreational cannabis in Canada  
13 is the impact on cannabis-related harms. It has been particularly difficult to predict the  
14 potential impact of this policy reform on treatment for cannabis use disorders.(23) The  
15 results of the present study demonstrate that as the normalization of cannabis use  
16 continues in Canada, less clients are receiving treatment for cannabis use disorders, but  
17 their addiction severity may be increasing. Taken together, these results may be indicative  
18 of reductions in clinically unnecessary treatments for cannabis use disorders, such as  
19 adolescents forced into treatment by others mainly for cannabis use. This explanation is  
20 supported by decreases in proportions of mandated treatments observed among clients.  
21 Corroborating this explanation further are observations from the United States, where  
22 cannabis use has been increasing, but the rate of cannabis use disorders per user is  
23 decreasing.(24) However, alternative explanations cannot be ruled out due to the study  
24 design. It is conversely possible that normalization of cannabis use may be affecting the  
25 patterns of usage, or leading to more accurate reporting about them due to less perceived  
26 stigma. Although both of these phenomena would depict increases in addiction severity,  
27 there are differences in the implications, as the former would be suggestive of actual  
28 increases in addiction severity and the latter of no changes in addiction severity. This is an  
29 important line of investigation that warrants further research.  
30  
31  
32  
33  
34

### 35 **4.3. Study Strengths and Limitations**

36 There are some notable strengths of the present study that deserve mention. The  
37 population-based nature of the data permits generalizability of the results. In addition,  
38 trends in new admissions and total caseloads were characterized, with the latter estimated  
39 for the first time. There are however some limitations of the present study that should be  
40 considered in the interpretation of the results. The data were susceptible to social  
41 desirability and recall biases, as they were based on self-reports. Data were also  
42 susceptible to misclassification bias, given they were obtained from a health administrative  
43 database not intended for research. On a similar note, group formation on the basis of self-  
44 reports of substance problems as opposed to diagnoses of substance use disorders may  
45 have also resulted in misclassification bias. As well as, it was not possible to determine if  
46 receipt of withdrawal management services among the CP group were for cannabis  
47 problems or other substance problems. The above described potential effects of social  
48 desirability, recall or misclassification biases might have affected the validity of the results  
49 reported in the present study. Furthermore, the data did not include private, self-help or  
50 pharmacotherapeutic services, resulting in underestimation of treatments received for  
51 cannabis problems. All data were ascertained at the beginning of the admissions. As such, it  
52 was not possible to account for changes in measures over time, which is particularly  
53 relevant to carryover admissions because they were represented across multiple fiscal  
54  
55  
56  
57  
58  
59  
60

1  
2  
3 years in analyses of total caseloads (ranging from 22% to 31% of total caseloads in a given  
4 fiscal year).  
5  
6

7 **4.4. Conclusions**

8 The impact of recreational cannabis legalization in Canada on treatment for cannabis use  
9 disorders needs to be monitored and assessed in the long term. The results of this study  
10 represent an important baseline. They indicate decreases in treatment utilization for  
11 cannabis problems in Ontario from 2010/11 to 2015/16, but corresponding increases in  
12 addiction severity. Together, these results may be suggestive of reductions in clinically  
13 unnecessary treatments of cannabis use disorders within the past five years.  
14  
15  
16  
17  
18  
19  
20  
21  
22  
23  
24  
25  
26  
27  
28  
29  
30  
31  
32  
33  
34  
35  
36  
37  
38  
39  
40  
41  
42  
43  
44  
45  
46  
47  
48  
49  
50  
51  
52  
53  
54  
55  
56  
57  
58  
59  
60

Confidential



## REFERENCES

1. Health Canada. Canadian Tobacco Alcohol and Drugs (CTADS): 2015 summary 2017 [Accessed 24 September 2017]. Available from: <https://www.canada.ca/en/health-canada/services/canadian-tobacco-alcohol-drugs-survey/2015-summary.html>.
2. Volkow ND, Baler RD, Compton WM, Weiss SR. Adverse health effects of marijuana use. *N Engl J Med*. 2014;370(23):2219-27.
3. American Psychiatric Association. Diagnostic and statistical manual of mental disorders, fifth edition. Arlington, VA: American Psychiatric Association; 2013.
4. Imtiaz S, Shield KD, Roerecke M, Cheng J, Popova S, Kurdyak P, et al. The burden of disease attributable to cannabis use in Canada in 2012. *Addiction*. 2016;111(4):653-62.
5. Fischer B, Imtiaz S, Rudzinski K, Rehm J. Crude estimates of cannabis-attributable mortality and morbidity in Canada-implications for public health focused intervention priorities. *J Public Health (Oxf)*. 2016;38(1):183-8.
6. Asbridge M, Valleriani J, Kwok J, Erickson PG. Normalization and denormalization in different legal contexts: Comparing cannabis and tobacco. *Drug-Educ Prev Polic*. 2016;23(3):212-23.
7. Sznitman SR, Taubman DS. Drug Use Normalization: A Systematic and Critical Mixed-Methods Review. *J Stud Alcohol Drugs*. 2016;77(5):700-9.
8. Fischer B, Kuganesan S, Room R. Medical Marijuana programs: implications for cannabis control policy--observations from Canada. *Int J Drug Policy*. 2015;26(1):15-9.
9. Fischer B, Ialomiteanu AR, Russell C, Rehm J, Mann RE. Public Opinion towards Cannabis Control in Ontario: Strong but Diversified Support for Reforming Control of Both Use and Supply. *Can J Criminol Crim*. 2016;58(3):443-59.
10. Health Canada. Canadian Tobacco Alcohol and Drugs (CTADS): 2013 summary 2015 [Accessed 24 September 2017]. Available from: <https://www.canada.ca/en/health-canada/services/canadian-tobacco-alcohol-drugs-survey/2013-summary.html>.
11. Ialomiteanu AR, Hamilton HA, Adlaf EM, Mann RE. CAMH Monitor e-Report: Substance Use, Mental Health and Well-Being Among Ontario Adults, 1977-2015. Toronto, ON: Centre for Addiction and Mental Health; 2016.
12. Urbanoski KA, Strike CJ, Rush BR. Individuals seeking treatment for cannabis-related problems in Ontario: demographic and treatment profile. *Eur Addict Res*. 2005;11(3):115-23.
13. Strike CJ, Urbanoski KA, Rush BR. Who seeks treatment for cannabis-related problems? *Can J Public Health*. 2003;94(5):351-4.
14. Castel S, Rush B, Urbanoski K, Toneatto T. Overlap of clusters of psychiatric symptoms among clients of a comprehensive addiction treatment service. *Psychol Addict Behav*. 2006;20(1):28-35.
15. Malat J, Turner NE. Characteristics of outpatients in an addictions clinic for co-occurring disorders. *Am J Addict*. 2013;22(3):297-301.
16. Clark SC, McKiernan W. Contacts with a Canadian "street-level" Drug and Crisis Centre, 1975-1978. *Bull Narc*. 1981;33(4):23-31.

17. Rotondi NK, Rush B. Monitoring Utilization of a Large Scale Addiction Treatment System: The Drug and Alcohol Treatment Information System (DATIS). *Subst Abuse*. 2012;6:73-84.
18. Pirie T, Wallingford SC, Di Gioacchino LA, McQuaid RJ, National Treatment Indicators Working Group. National treatment indicators report: 2013– 2014 data. Ottawa, ON: Canadian Centre on Substance Abuse; 2016.
19. Pirie T, National Treatment Indicators Working Group. National treatment indicators report: 2012–2013 data. Ottawa, ON: Canadian Centre on Substance Abuse; 2015.
20. Azofeifa A, Mattson ME, Grant A. Monitoring Marijuana Use in the United States: Challenges in an Evolving Environment. *JAMA*. 2016;316(17):1765-6.
21. Fischer B, Russell C, Sabioni P, van den Brink W, Le Foll B, Hall W, et al. Lower-Risk Cannabis Use Guidelines: A Comprehensive Update of Evidence and Recommendations. *Am J Public Health*. 2017;107(8):e1-e12.
22. Freeman TP, Winstock AR. Examining the profile of high-potency cannabis and its association with severity of cannabis dependence. *Psychol Med*. 2015;45(15):3181-9.
23. Hall W, Lynskey M. Evaluating the public health impacts of legalizing recreational cannabis use in the United States. *Addiction*. 2016;111(10):1764-73.
24. Grucza RA, Agrawal A, Krauss MJ, Cavazos-Rehg PA, Bierut LJ. Recent Trends in the Prevalence of Marijuana Use and Associated Disorders in the United States. *JAMA Psychiatry*. 2016;73(3):300-1.

**Table 1: Trends in sociodemographic characteristics between 2010/11 and 2015/16 among new admissions of clients receiving treatment for cannabis as the only problem substance and cannabis plus other problem substances**

|                            | CO New Admissions |       |         |       | P-Value | CP New Admissions |       |         |       | P-Value~ |
|----------------------------|-------------------|-------|---------|-------|---------|-------------------|-------|---------|-------|----------|
|                            | 2010/11           |       | 2015/16 |       |         | 2010/11           |       | 2015/16 |       |          |
|                            | N                 | %     | N       | %     |         | N                 | %     | N       | %     |          |
| <b>Sex</b>                 |                   |       |         |       | 0.039   |                   |       |         |       | 0.002    |
| Males                      | 2143              | 72.55 | 1633    | 69.97 |         | 10782             | 69.81 | 10387   | 68.17 |          |
| Females                    | 811               | 27.45 | 701     | 30.03 |         | 4663              | 30.19 | 4850    | 31.83 |          |
| <b>Age</b>                 |                   |       |         |       | 0.000   |                   |       |         |       | 0.000    |
| < 18                       | 1344              | 45.51 | 779     | 33.26 |         | 2080              | 13.46 | 1372    | 8.98  |          |
| 18 - 24                    | 861               | 29.16 | 743     | 31.73 |         | 4139              | 26.79 | 3814    | 24.96 |          |
| 25 - 44                    | 580               | 19.64 | 656     | 28.01 |         | 7182              | 46.48 | 7807    | 51.10 |          |
| > 44                       | 168               | 5.69  | 164     | 7.00  |         | 2050              | 13.27 | 2286    | 14.96 |          |
| <b>Relationship Status</b> |                   |       |         |       | 0.017   |                   |       |         |       | 0.025    |
| Married                    | 378               | 12.89 | 355     | 15.48 |         | 2617              | 17.05 | 2527    | 16.94 |          |
| Single                     | 2424              | 82.65 | 1816    | 79.20 |         | 10946             | 71.33 | 10757   | 72.10 |          |
| Window(er)                 | 7                 | 0.24  | 8       | 0.35  |         | 86                | 0.56  | 110     | 0.74  |          |
| Separated or divorced      | 124               | 4.23  | 114     | 4.97  |         | 1697              | 11.06 | 1525    | 10.22 |          |
| <b>Education</b>           |                   |       |         |       | 0.000   |                   |       |         |       | 0.000    |
| < Secondary school         | 2089              | 71.86 | 1304    | 57.98 |         | 8254              | 54.55 | 6654    | 45.23 |          |
| Completed secondary school | 414               | 14.24 | 492     | 21.88 |         | 3393              | 22.42 | 3638    | 24.73 |          |
| Some post-secondary        | 228               | 7.84  | 225     | 10.00 |         | 1816              | 12.00 | 2147    | 14.60 |          |
| Completed post-secondary   | 176               | 6.05  | 228     | 10.14 |         | 1668              | 11.02 | 2271    | 15.44 |          |
| <b>Employment Status</b>   |                   |       |         |       | 0.000   |                   |       |         |       | 0.000    |
| Full- or part-time         | 594               | 20.53 | 673     | 29.43 |         | 3848              | 25.27 | 4265    | 28.30 |          |
| Unemployed                 | 524               | 18.11 | 464     | 20.29 |         | 5763              | 37.84 | 5725    | 37.98 |          |
| Student/retraining         | 1488              | 51.42 | 845     | 36.95 |         | 2725              | 17.89 | 1833    | 12.16 |          |
| Disabled                   | 174               | 6.01  | 176     | 7.70  |         | 1687              | 11.08 | 2187    | 14.51 |          |
| Not in labor force         | 114               | 3.94  | 129     | 5.64  |         | 1207              | 7.93  | 1062    | 7.05  |          |
| <b>Legal Problems</b>      |                   |       |         |       | 0.000   |                   |       |         |       | 0.000    |

1  
2  
3  
4  
5  
6  
7  
8  
9  
10  
11  
12  
13  
14  
15  
16  
17  
18  
19  
20  
21  
22  
23  
24  
25  
26  
27  
28  
29  
30  
31  
32  
33  
34  
35  
36  
37  
38  
39  
40  
41  
42  
43  
44  
45  
46  
47  
48  
49

|                                   |      |       |      |       |       |       |       |       |       |
|-----------------------------------|------|-------|------|-------|-------|-------|-------|-------|-------|
| None                              | 1923 | 68.12 | 1591 | 69.72 |       | 9532  | 63.41 | 10044 | 66.92 |
| Awaiting trial or sentencing      | 235  | 8.32  | 255  | 11.17 |       | 1807  | 12.02 | 1930  | 12.86 |
| Probation, parole or incarcerated | 370  | 13.11 | 239  | 10.47 |       | 3083  | 20.51 | 2476  | 16.50 |
| Other                             | 295  | 10.45 | 197  | 8.63  |       | 610   | 4.06  | 558   | 3.72  |
| <b>Treatment Mandate</b>          |      |       |      |       | 0.000 |       |       |       | 0.000 |
| None                              | 1459 | 51.30 | 1341 | 58.28 |       | 10436 | 69.05 | 11672 | 77.24 |
| Legal system                      | 350  | 12.31 | 276  | 11.99 |       | 2018  | 13.35 | 1665  | 11.02 |
| Child welfare authority           | 137  | 4.82  | 95   | 4.13  |       | 663   | 4.39  | 464   | 3.07  |
| Employee or school authority      | 337  | 11.85 | 230  | 10.00 |       | 625   | 4.14  | 336   | 2.22  |
| Family                            | 210  | 7.38  | 123  | 5.35  |       | 577   | 3.82  | 350   | 2.32  |
| Other                             | 351  | 12.34 | 236  | 10.26 |       | 794   | 5.25  | 625   | 4.14  |

Abbreviations: *CO*: cannabis as the only problem substance, *CP*: cannabis plus other problem substances  
~ P-value obtained from the chi-square test

Confidential

**Table 2: Trends in cannabis use frequency among new admissions and total caseloads^ of clients receiving treatment for cannabis as the only problem substance (CO) and cannabis plus other problem substances (CP) between 2010/11 and 2015/16**

|                          | 2010/11 |       | 2011/12 |       | 2012/13 |       | 2013/14 |       | 2014/15 |       | 2015/16 |       | P-Value~ |
|--------------------------|---------|-------|---------|-------|---------|-------|---------|-------|---------|-------|---------|-------|----------|
|                          | N       | %     | N       | %     | N       | %     | N       | %     | N       | %     | N       | %     |          |
| <b>CO New Admissions</b> |         |       |         |       |         |       |         |       |         |       |         |       |          |
| Did not use              | 382     | 13.79 | 341     | 11.75 | 367     | 14.19 | 327     | 12.74 | 353     | 13.76 | 275     | 12.26 | 0.000    |
| 1-3 times monthly        | 284     | 10.25 | 307     | 10.58 | 260     | 10.05 | 301     | 11.73 | 281     | 10.95 | 197     | 8.78  |          |
| 1-2 times weekly         | 553     | 19.96 | 615     | 21.18 | 469     | 18.13 | 374     | 14.58 | 385     | 15.00 | 297     | 13.24 |          |
| 3-6 times weekly         | 480     | 17.32 | 429     | 14.78 | 423     | 16.35 | 426     | 16.60 | 426     | 16.60 | 360     | 16.05 |          |
| Daily                    | 1014    | 36.59 | 1156    | 39.82 | 1027    | 39.70 | 1078    | 42.01 | 1072    | 41.78 | 1077    | 48.02 |          |
| Binge                    | 58      | 2.09  | 55      | 1.89  | 41      | 1.58  | 60      | 2.34  | 49      | 1.91  | 37      | 1.65  |          |
| <b>CO Total Caseload</b> |         |       |         |       |         |       |         |       |         |       |         |       |          |
| Did not use              | -       | -     | 468     | 12.03 | 495     | 13.31 | 469     | 12.71 | 486     | 13.12 | 437     | 12.58 | 0.000    |
| 1-3 times monthly        | -       | -     | 417     | 10.72 | 392     | 10.54 | 421     | 11.41 | 405     | 10.93 | 326     | 9.38  |          |
| 1-2 times weekly         | -       | -     | 760     | 19.54 | 640     | 17.21 | 543     | 14.72 | 556     | 15.01 | 466     | 13.41 |          |
| 3-6 times weekly         | -       | -     | 603     | 15.50 | 612     | 16.46 | 637     | 17.26 | 626     | 16.90 | 555     | 15.97 |          |
| Daily                    | -       | -     | 1572    | 40.41 | 1517    | 40.80 | 1550    | 42.01 | 1568    | 42.33 | 1637    | 47.11 |          |
| Binge                    | -       | -     | 70      | 1.80  | 62      | 1.67  | 70      | 1.90  | 63      | 1.70  | 54      | 1.55  |          |
| <b>CP New Admissions</b> |         |       |         |       |         |       |         |       |         |       |         |       |          |
| Did not use              | 2161    | 14.35 | 2163    | 13.88 | 2011    | 13.34 | 2045    | 13.21 | 1925    | 12.66 | 1853    | 12.48 | 0.000    |
| 1-3 times monthly        | 2134    | 14.18 | 2129    | 13.66 | 2095    | 13.90 | 2135    | 13.79 | 2095    | 13.77 | 1887    | 12.71 |          |
| 1-2 times weekly         | 2006    | 13.33 | 2010    | 12.90 | 1935    | 12.84 | 1926    | 12.44 | 1801    | 11.84 | 1790    | 12.06 |          |
| 3-6 times weekly         | 2005    | 13.32 | 2102    | 13.49 | 2113    | 14.02 | 2070    | 13.37 | 2055    | 13.51 | 1880    | 12.67 |          |
| Daily                    | 6111    | 40.59 | 6518    | 41.83 | 6268    | 41.59 | 6633    | 42.85 | 6721    | 44.19 | 6775    | 45.64 |          |
| Binge                    | 637     | 4.23  | 661     | 4.24  | 650     | 4.31  | 669     | 4.32  | 612     | 4.02  | 658     | 4.43  |          |
| <b>CP Total Caseload</b> |         |       |         |       |         |       |         |       |         |       |         |       |          |
| Did not use              | -       | -     | 2941    | 14.99 | 2857    | 14.48 | 2893    | 14.12 | 2894    | 13.79 | 2911    | 13.75 | 0.000    |
| 1-3 times monthly        | -       | -     | 2689    | 13.71 | 2768    | 14.02 | 2854    | 13.93 | 2894    | 13.79 | 2774    | 13.10 |          |
| 1-2 times weekly         | -       | -     | 2515    | 12.82 | 2530    | 12.82 | 2562    | 12.50 | 2562    | 12.20 | 2587    | 12.22 |          |

1  
2  
3  
4  
5  
6  
7  
8  
9  
10  
11  
12  
13  
14  
15  
16  
17  
18  
19  
20  
21  
22  
23  
24  
25  
26  
27  
28  
29  
30  
31  
32  
33  
34  
35  
36  
37  
38  
39  
40  
41  
42  
43  
44  
45  
46  
47  
48  
49

|                  |   |   |      |       |      |       |      |       |      |       |      |       |
|------------------|---|---|------|-------|------|-------|------|-------|------|-------|------|-------|
| 3-6 times weekly | - | - | 2677 | 13.64 | 2783 | 14.10 | 2805 | 13.69 | 2868 | 13.66 | 2756 | 13.01 |
| Daily            | - | - | 8028 | 40.92 | 8034 | 40.71 | 8558 | 41.77 | 9006 | 42.90 | 9307 | 43.95 |
| Binge            | - | - | 770  | 3.92  | 765  | 3.88  | 817  | 3.99  | 769  | 3.66  | 841  | 3.97  |

Abbreviations: *CO*: cannabis as the only problem substance, *CP*: cannabis plus other problem substances  
 ^ Total caseload estimates were not generated for 2010/11  
 ~ P-value obtained from the chi-square test

Confidential



Figure 1: Trends in new admissions and total caseload of clients receiving treatment for cannabis as the only problem substance between 2010/11 – 2015/16

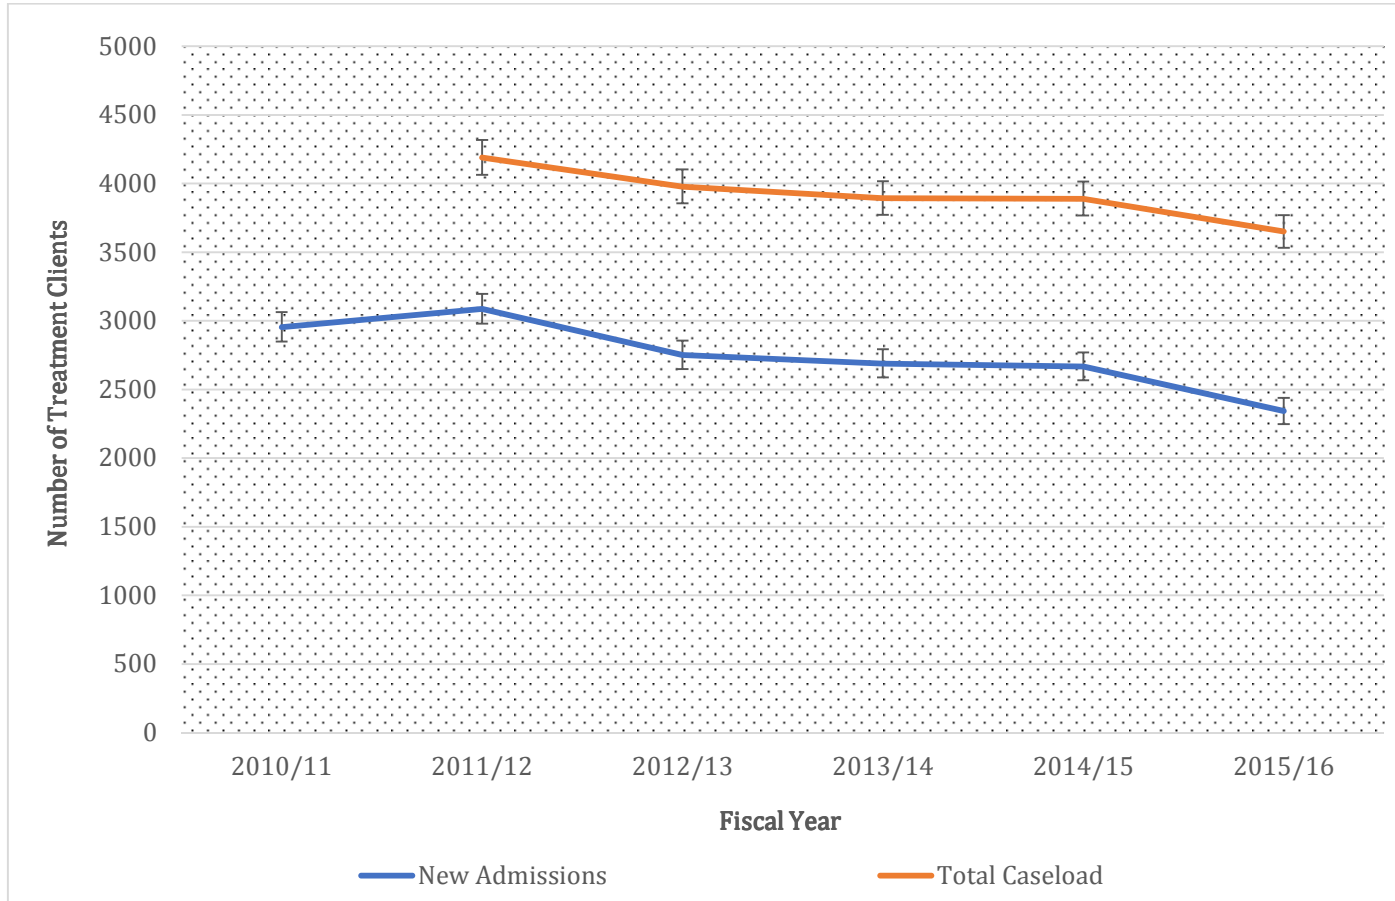

1  
2  
3  
4  
5  
6  
7  
8  
9  
10  
11  
12  
13  
14  
15  
16  
17  
18  
19  
20  
21  
22  
23  
24  
25  
26  
27  
28  
29  
30  
31  
32  
33  
34  
35  
36  
37  
38  
39  
40  
41  
42  
43  
44  
45  
46  
47  
48  
49

Figure 2: Trends in new admissions and total caseload of clients receiving treatment for cannabis plus other problem substances between 2010/11 – 2015/16

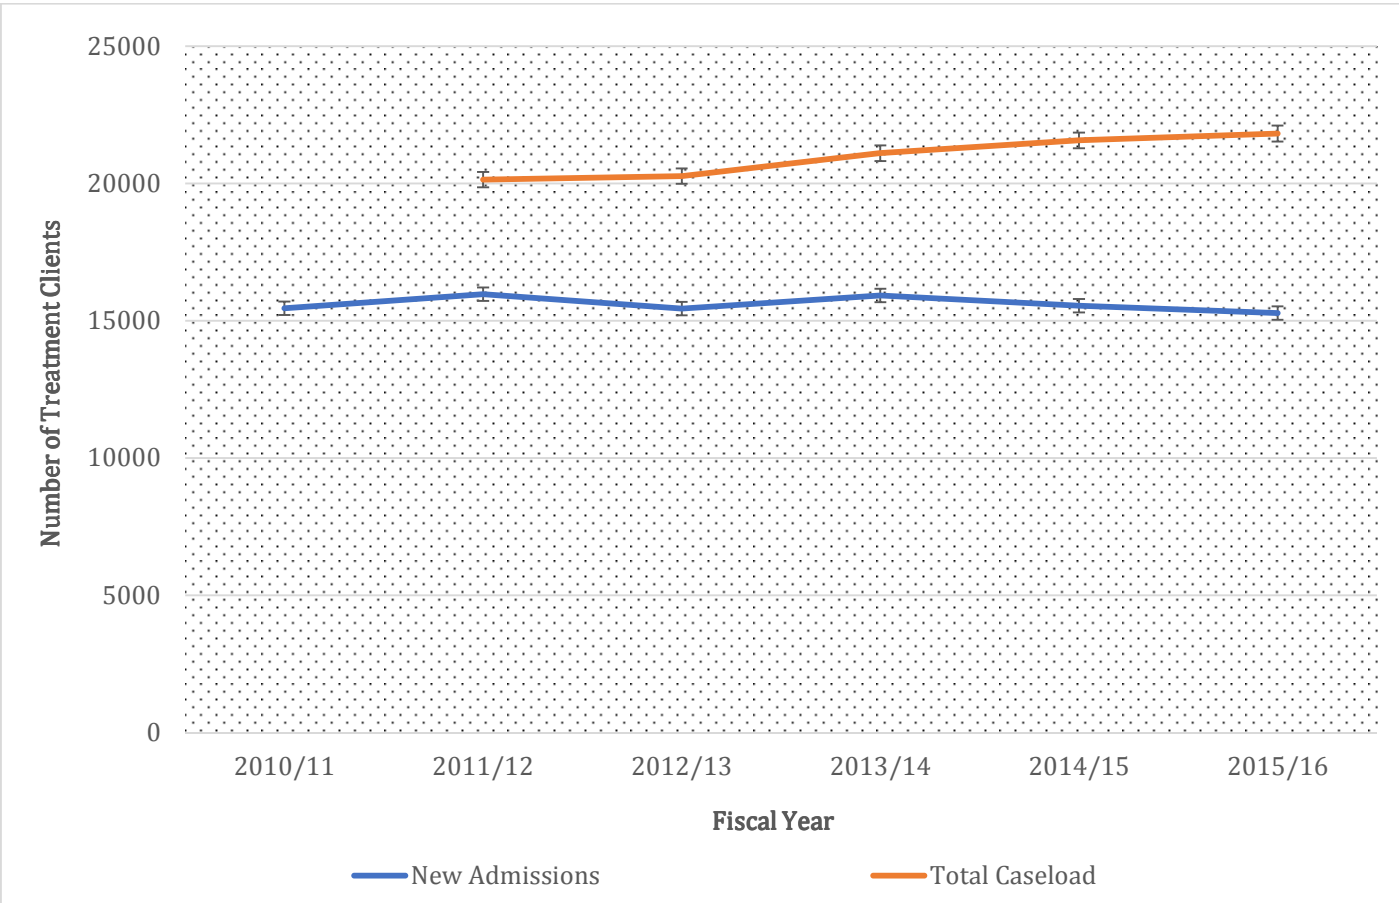

Supplementary Appendix To: Trends in Treatment for Cannabis Problems in Ontario: Fiscal  
Years 2010/11 to 2015/16

Confidential

1  
2  
3  
4  
5  
6  
7  
8  
9  
10  
11  
12  
13  
14  
15  
16  
17  
18  
19  
20  
21  
22  
23  
24  
25  
26  
27  
28  
29  
30  
31  
32  
33  
34  
35  
36  
37  
38  
39  
40  
41  
42  
43  
44  
45  
46  
47  
48  
49  
50  
51  
52  
53  
54  
55  
56  
57  
58  
59  
60

1  
2  
3  
4  
5  
6  
7  
8  
9  
10  
11  
12  
13  
14  
15  
16  
17  
18  
19  
20  
21  
22  
23  
24  
25  
26  
27  
28  
29  
30  
31  
32  
33  
34  
35  
36  
37  
38  
39  
40  
41  
42  
43  
44  
45  
46  
47  
48  
49

**Supplementary Tables**

**Table S1: Trends in new admissions and total caseload of clients receiving treatment for cannabis as the only problem substance and cannabis plus other problem substances between 2010/11 – 2015/16**

| Year                       | CO New Admissions |             | CO Total Caseload <sup>^</sup> |             | CP New Admissions |               | CP Total Caseload <sup>^</sup> |               |
|----------------------------|-------------------|-------------|--------------------------------|-------------|-------------------|---------------|--------------------------------|---------------|
|                            | N                 | 95% CI      | N                              | 95% CI      | N                 | 95% CI        | N                              | 95% CI        |
| 2010/11                    | 2954              | 2848 - 3062 | -                              | -           | 15451             | 15208 - 15697 | -                              | -             |
| 2011/12                    | 3086              | 2978 - 3197 | 4188                           | 4062 - 4317 | 15966             | 15719 - 16216 | 20139                          | 19862 - 20419 |
| 2012/13                    | 2751              | 2649 - 2856 | 3978                           | 3855 - 4104 | 15441             | 15198 - 15687 | 20264                          | 19986 - 20545 |
| 2013/14                    | 2689              | 2588 - 2793 | 3892                           | 3771 - 4016 | 15918             | 15672 - 16167 | 21105                          | 20821 - 21392 |
| 2014/15                    | 2667              | 2567 - 2770 | 3889                           | 3768 - 4013 | 15545             | 15302 - 15791 | 21569                          | 21282 - 21859 |
| 2015/16                    | 2342              | 2248 - 2439 | 3650                           | 3533 - 3770 | 15280             | 15039 - 15524 | 21816                          | 21527 - 22107 |
| <b>P-Value<sup>~</sup></b> | 0.012             |             | 0.013                          |             | 0.543             |               | 0.005                          |               |

Abbreviations: *CO*: cannabis as the only problem substance, *CP*: cannabis plus other problem substances, *CI*: confidence interval

<sup>^</sup> Total caseload estimates were not generated for 2010/11

<sup>~</sup> P-value obtained from the linear trend test

**Table S2: Trends in rates of utilization of withdrawal management services among new admissions and total caseloads of clients receiving treatment for cannabis as the only problem substance and cannabis plus other problem substances between 2010/11 – 2015/16**

| Year                       | CO New Admissions<br>Rate* | CO Total Caseload <sup>^</sup><br>Rate* | CP New Admissions<br>Rate* | CP Total Caseload <sup>^</sup><br>Rate* |
|----------------------------|----------------------------|-----------------------------------------|----------------------------|-----------------------------------------|
| 2010/11                    | 4.74                       | -                                       | 31.66                      | -                                       |
| 2011/12                    | 4.93                       | 4.15                                    | 30.68                      | 25.52                                   |
| 2012/13                    | 4.80                       | 3.92                                    | 28.20                      | 22.90                                   |
| 2013/14                    | 4.80                       | 3.83                                    | 27.58                      | 22.30                                   |
| 2014/15                    | 5.70                       | 4.81                                    | 29.17                      | 23.33                                   |
| 2015/16                    | 6.79                       | 5.42                                    | 30.14                      | 23.94                                   |
| <b>P-Value<sup>~</sup></b> | 0.044                      | 0.103                                   | 0.381                      | 0.560                                   |

Abbreviations: *CO*: cannabis as the only problem substance, *CP*: cannabis plus other problem substances

\* Rate per 100 clients

<sup>^</sup> Total caseload estimates were not generated for 2010/11

<sup>~</sup> P-value obtained from the linear trend test
